# Supplementary material for: Production of drop-in fuels from biomass at high selectivity by combined microbial and electrochemical conversion
Source: Royal Society of Chemistry journal article supplement (doi:10.1039/c7ee01303e), 2017-01-01
Supplement: c7ee01303e1.pdf [file c7ee01303e1.pdf]

# Supporting Information

1

## 2 Production of drop-in fuel from biomass at high selectivity by 3 combined microbial and electrochemical conversion

4 Carolin Urban<sup>[a]</sup>, Jiajie Xu<sup>[b]</sup>, Heike Sträuber<sup>[a]</sup>, Tatiane R. dos Santos Dantas<sup>[a]</sup>, Jana  
5 Mühlenberg<sup>[c]</sup>, Claus Härtig<sup>[a]</sup>, Largus T. Angenent<sup>[b, d]</sup>, Falk Harnisch<sup>[a]\*</sup>

6

7 [a] UFZ – Helmholtz-Centre for Environmental Research; Department of Environmental Microbiology;  
8 Permoserstraße 15, 04318 Leipzig (Germany); fax: (+49) 341 235 – 1351; E-mail: [falk.harnisch@ufz.de](mailto:falk.harnisch@ufz.de)

9 [b] Cornell University; Department of Biological and Environmental Engineering, 226 Riley–Robb Hall, Ithaca, NY  
10 14853 (USA)

11 [c] DBFZ – Deutsches Biomasseforschungszentrum gemeinnützige GmbH; Department Biochemical Conversion,  
12 Torgauer Straße 116, 04347 Leipzig (Germany)

13 [d] University of Tübingen; Center for Applied Geoscience, Hölderlinstr. 12, 72074 Tübingen (Germany)

14 \*author of correspondence: [falk.harnisch@ufz.de](mailto:falk.harnisch@ufz.de)

## 16 Table of content

17

|    |            |                                                                                      |           |
|----|------------|--------------------------------------------------------------------------------------|-----------|
| 18 | <b>S 1</b> | <b>Theoretical background and calculations</b> .....                                 | <b>3</b>  |
| 19 | S 1.1      | Accessing the share of dissociated carboxylic acid molecules.....                    | 6         |
| 20 | S 1.2      | Evaluation of the microbial carboxylic acid production.....                          | 6         |
| 21 | S 1.3      | Step 3 – <i>Kolbe electrolysis</i> : Electrolysis performance.....                   | 10        |
| 22 | S 1.4      | Process scheme for carboxylic acid electrolysis (oxidation).....                     | 12        |
| 23 | <b>S 2</b> | <b>Results</b> .....                                                                 | <b>13</b> |
| 24 | S 2.1      | Details on the performance of the microbial and electrochemical                      |           |
| 25 |            | conversions.....                                                                     | 13        |
| 26 | S 2.2      | Step 1 – <i>Bioreactor</i> : Carboxylic acid production in case study B (batch)..... | 16        |
| 27 | S 2.3      | Step 3 – <i>Kolbe electrolysis</i> : Liquid, non-aqueous carboxylic acid             |           |
| 28 |            | electrolysis product composition.....                                                | 17        |
| 29 | S 2.4      | Step 3 – <i>Kolbe electrolysis</i> : Oxygen, hydrogen and carbon content of          |           |
| 30 |            | non-aqueous, liquid electrolysis product.....                                        | 19        |
| 31 | S 2.5      | Estimation of temperature dependent density.....                                     | 20        |
| 32 | S 2.6      | Brief comparison to established biofuels.....                                        | 22        |
| 33 | S 2.7      | Overall performance and engineering of the process-line.....                         | 23        |
| 34 | <b>S 3</b> | <b>Experimental</b> .....                                                            | <b>25</b> |
| 35 | S 3.1      | Step 1 – <i>Bioreactor</i> : Microbial carboxylic acid fermentation.....             | 25        |
| 36 | S 3.2      | Chemical Analysis.....                                                               | 26        |
| 37 | S 3.3      | Characterizing fuel properties of the CA electrolysis product.....                   | 30        |
| 38 | <b>S 4</b> | <b>References</b> .....                                                              | <b>32</b> |

39

## 41 S 1 Theoretical background and calculations

42 Table S 1: List of abbreviations and symbol directory.

| Abbreviation/<br>Symbol | Name                                                                                                                                  | Unit                    |
|-------------------------|---------------------------------------------------------------------------------------------------------------------------------------|-------------------------|
| $A_{electrode}$         | geometrical surface area of the working electrode                                                                                     | cm <sup>2</sup>         |
| ASBR                    | anaerobic sequencing batch bioreactor (case study A)                                                                                  | -                       |
| $B_1 - B_4$             | factors for temperature dependent density conversion                                                                                  | -                       |
| bp                      | boiling point                                                                                                                         | °C                      |
| $c_i$                   | concentration of CA with $i$ C-atoms ( $i = 3..8$ )                                                                                   | mol L <sup>-1</sup>     |
| $c_{i\_b\_tx}$          | concentration of CA with $i$ C-atoms ( $i = 3..8$ ) in the back-extraction solution of case study A at time $t_x$ with $x = 0$ or $1$ | g L <sup>-1</sup>       |
| $c_{i\_e\_tx}$          | concentration of CA with $i$ C-atoms ( $i = 3..8$ ) in the effluent of case study A at time $t_x$ with $x = 0$ or $1$                 | g L <sup>-1</sup>       |
| $C_i$                   | $n$ -carboxylic acid with $i$ C-atoms ( $i = 3..8$ )                                                                                  | -                       |
| $c(A^-)$                | concentration of dissociated CA                                                                                                       | mol L <sup>-1</sup>     |
| $c(HA)$                 | concentration of protonated CA                                                                                                        | mol L <sup>-1</sup>     |
| CA                      | carboxylic acid                                                                                                                       | -                       |
| CE                      | coulombic efficiency                                                                                                                  | %                       |
| CH <sub>4</sub>         | methane                                                                                                                               | -                       |
| CN                      | cetane number                                                                                                                         | -                       |
| CO <sub>2</sub>         | carbon dioxide                                                                                                                        | -                       |
| COD                     | chemical oxygen demand                                                                                                                | g g <sup>-1</sup>       |
| $E_{CE}$                | counter electrode potential, expressed vs. Ag/AgCl sat.                                                                               | V                       |
| $E_{cell}$              | cell potential                                                                                                                        | V                       |
| $E_{WE}$                | working electrode potential, expressed vs. Ag/AgCl sat.                                                                               | V                       |
| F                       | Faraday constant, 96485.33 C mol <sup>-1</sup>                                                                                        | C mol <sup>-1</sup>     |
| $f_{COD\_C_i}$          | conversion factor – gravimetric COD content per mass equivalent of $C_i$                                                              | g COD g <sup>-1</sup>   |
| FAME                    | fatty acid methyl esters                                                                                                              | -                       |
| FE                      | Farad equivalents                                                                                                                     | -                       |
| $feed_{cornbeer}$       | daily substrate feed of corn beer in case study A                                                                                     | g COD L d <sup>-1</sup> |
| GC-MS                   | gas chromatography-mass spectrometry                                                                                                  | -                       |

43 Continuation Table S1. List of abbreviations and symbol directory.

| Abbreviation/<br>Symbol                        | Name                                                                                                                                        | Unit                                 |
|------------------------------------------------|---------------------------------------------------------------------------------------------------------------------------------------------|--------------------------------------|
| GC-TCD                                         | gas chromatography-thermal conductivity detector                                                                                            | -                                    |
| H <sub>2</sub>                                 | hydrogen                                                                                                                                    | -                                    |
| HRT                                            | hydraulic retention time of substrate in case study A                                                                                       | d                                    |
| HPLC                                           | high performance liquid chromatography                                                                                                      | -                                    |
| HVO                                            | hydrogenated vegetable oil                                                                                                                  | -                                    |
| <i>i</i>                                       | current                                                                                                                                     | A                                    |
| IS                                             | inert solids                                                                                                                                | -                                    |
| <i>j<sub>av</sub></i>                          | average area-related current density                                                                                                        | mA cm <sup>-2</sup>                  |
| <i>j<sub>max</sub></i>                         | maximum area-related current density                                                                                                        | mA cm <sup>-2</sup>                  |
| <i>m<sub>C<sub>i</sub>t<sub>j</sub></sub></i>  | the total gravimetric CA content in the process liquid at time <i>t<sub>j</sub></i> with <i>j</i> = 0 or 1                                  | kg                                   |
| <i>m<sub>COD_C<sub>i</sub></sub></i>           | COD content per mol of C <sub>i</sub>                                                                                                       | g COD mol <sup>-1</sup>              |
| <i>M<sub>i</sub></i>                           | molar mass of component <i>i</i> = C <sub>i</sub> or O <sub>2</sub>                                                                         | g mol <sup>-1</sup>                  |
| MCCA                                           | medium-chain carboxylic acids (six to twelve carbon atoms)                                                                                  | -                                    |
| N <sub>2</sub>                                 | nitrogen                                                                                                                                    | -                                    |
| <i>n<sub>CA_elec</sub></i>                     | amount of electrochemically converted CA                                                                                                    | mol                                  |
| <i>n<sub>CA_tot</sub></i>                      | total amount of CA in electrolysis volume                                                                                                   | mol                                  |
| <i>n<sub>O<sub>2</sub>-C<sub>i</sub></sub></i> | amount of oxygen demand per complete oxidation of C <sub>i</sub>                                                                            | mol O <sub>2</sub> mol <sup>-1</sup> |
| opex                                           | operating expenditures                                                                                                                      | € / US\$                             |
| <i>p<sub>0</sub></i>                           | normal pressure, 101325 Pa                                                                                                                  | Pa                                   |
| <i>p<sub>L</sub></i>                           | ambient air pressure                                                                                                                        | Pa                                   |
| <i>p<sub>w</sub></i>                           | vapor pressure of water in dependency of the ambient temperature                                                                            | Pa                                   |
| <i>P<sub>WE</sub></i>                          | power input for the electrochemical half cell reaction at the working electrode                                                             | W                                    |
| <i>Q<sub>CA_elec</sub></i>                     | charge that is theoretically required to convert the electrochemically converted educt molecules in solution ( <i>n<sub>CA_elec</sub></i> ) | C                                    |
| <i>Q<sub>CA_tot</sub></i>                      | charge that is theoretically required to convert <i>all</i> educt molecules in solution ( <i>n<sub>CA_tot</sub></i> )                       | C                                    |
| <i>Q<sub>t</sub></i>                           | charge that was transferred during electrolysis                                                                                             | C                                    |

45 Continuation Table S1. List of abbreviations and symbol directory.

| Abbreviation/<br>Symbol | Name                                                                                                                                            | Unit                               |
|-------------------------|-------------------------------------------------------------------------------------------------------------------------------------------------|------------------------------------|
| $r_{Ci\_d\_k}$          | daily CA production rate of CA with $i$ C-atoms for case study $k = A$ or $B$                                                                   | $\text{g L}^{-1} \text{d}^{-1}$    |
| $r_{CA}$                | electrochemical CA conversion rate                                                                                                              | $\text{mol cm}^{-2} \text{h}^{-1}$ |
| $t$                     | time                                                                                                                                            | s                                  |
| $T$                     | ambient temperature                                                                                                                             | K                                  |
| $T_0$                   | normal temperature, 273 K                                                                                                                       | K                                  |
| $t_{elec}$              | duration of the electrolysis                                                                                                                    | h                                  |
| TS                      | total solids                                                                                                                                    | % (fresh mass)                     |
| $V_0$                   | normal volume                                                                                                                                   | $\text{m}^3$                       |
| $V_{ASBR}$              | working volume anaerobic bioreactor in case study A                                                                                             | L                                  |
| $V_{effluent}$          | liquid volume of the effluent exchanged in the semi-continuous operation of bioreactor operated in case study A (exchange of 666 mL every 48 h) | L                                  |
| $V_{extraction}$        | liquid volume of the alkaline back-extraction solution in case study A                                                                          | L                                  |
| $V_{gas\_measured}$     | gas volume estimated via water displacement                                                                                                     | $\text{m}^3$                       |
| $V_{leach-bed reactor}$ | working volume of the leach-bed reactor in case study B                                                                                         | L                                  |
| VS                      | volatile solids                                                                                                                                 | % (TS)                             |
| $W_{WE}$                | energy input to the electrochemical half cell reaction per converted mol of CA                                                                  | $\text{kWh mol}^{-1}$              |
| $z$                     | charge transfer number                                                                                                                          | -                                  |
| <b>Greek letters</b>    |                                                                                                                                                 |                                    |
| $\rho$                  | density                                                                                                                                         | $\text{g cm}^{-3}$                 |
| $\kappa$                | electrolytic conductivity                                                                                                                       | $\text{mS cm}^{-1}$                |

## 47 S 1.1 Accessing the share of dissociated carboxylic acid molecules

48 The share of dissociated CA molecules in aqueous solution in dependency of the solution pH  
49 was estimated applying the Henderson-Hasselbalch-equation (eq. S1), with  $c(A^-)$  being the  
50 concentration of CA ions and  $c(HA)$  being the protonated form of the CA. Further, it is known  
51 that the sum of  $c(A^-)$  and  $c(HA)$  equals the total concentration of CA in solution (with  $i$  C-  
52 atoms),  $c_i$ , (eq. S2). Consequently, eq. S1 and eq. S2 can be joined to give eq. S3 which  
53 gives the concentration of dissociated CA molecules in dependence of the pH. Relating  $c(A^-)$   
54 to  $c_{CA}$  equals the share of dissociated CA molecules.

$$pH = pK_a + \log_{10} \left( \frac{c(A^-)}{c(HA)} \right) \quad (\text{eq. S1})$$

$$c_i = c(A^-) + c(HA) \quad (\text{eq. S2})$$

$$c(A^-) = \frac{c_i \cdot 10^{(pH - pK_a)}}{1 + 10^{(pH - pK_a)}} \quad (\text{eq. S3})$$

55

## 56 S 1.2 Evaluation of the microbial carboxylic acid production

### 57 S 1.2.1 Step 1 – Bioreactor: Carboxylic acid production rate

58 In case study A, the daily production rate of the carboxylic acids (CA) containing  $i$  C-atoms,  
59  $r_{Ci\_d\_A}$ , was determined according to eq. S4 considering: (i) the gravimetric amount of CA that  
60 was removed from the bioreactor via the effluent stream (i.e. the gravimetric CA  
61 concentration in the effluent at the time  $t_1$ ,  $c_{i\_e\_t1}$ ) times the effluent volume,  $V_{effluent}$  (666 mL  
62 every 48 h, cf. experimental section), in relation to the hydraulic retention time, HRT, of 15 d;  
63 as well as (ii) the CA accumulating in the alkaline back-extraction solution (i.e. the delta in  
64 the gravimetric CA concentration in the back-extraction solution,  $c_{i\_b\_t1} - c_{i\_b\_t0}$ ) times the  
65 liquid volume of the back-extraction solution,  $V_{extraction}$ , related to the delta in operating time,  
66  $t_1 - t_0$ . The total amount of accumulating CA from (i) and (ii) (expressed in g d<sup>-1</sup>) was summed  
67 up and related to the liquid bioreactor volume,  $V_{ASBR}$  (= 5 L). Table S2 lists a *representative*  
68 *production rate* for CA (medium- and short-chain) for the described bioreactor conditions.

$$r_{Ci\_d\_A} = \left[ \frac{c_{i\_e\_t1} \cdot V_{ASBR}}{HRT} + \frac{(c_{i\_b\_t1} - c_{i\_b\_t0}) V_{extraction}}{(t_1 - t_0)} \right] \cdot \frac{1}{V_{ASBR}} \quad (\text{eq. S4})$$

69

70 In case study B, the maximum production rate of CA in the batch setup was accessed by eq.  
 71 S5, where  $r_{Ci\_d\_B}$  is the maximum production rate of  $C_i$  in case study B (in  $g_{Ci} L^{-1} d^{-1}$ ),  $m_{Ci\_t1}$   
 72 and  $m_{Ci\_t0}$  are the total CA amounts in the process liquid (in g) at the operating times  $t_1$  and  $t_0$ ,  
 73 respectively,  $V_{leach-bed reactor}$  is the working volume of the leach-bed reactor (= 11.5 L) and  $t_0$   
 74 and  $t_1$  are beginning and end of the maximum production period of CA (in d), respectively.

$$r_{Ci\_d\_B} = \frac{m_{Ci\_t1} - m_{Ci\_t0}}{(t_1 - t_0) \cdot V_{leach-bed reactor}} \quad (\text{eq. S5})$$

75

### 76 S 1.2.2 Chemical oxygen demand and carboxylic acid yield

77 To determine the chemical oxygen demand (COD), per CA, *i.e.* the amount of oxygen  
 78 required for a complete oxidation of the particular CA to carbon dioxide and water, the  
 79 chemical equation needs to be accessed and the amount of oxygen in mol per mol CA,  
 80  $n_{O2\_Ci}$ , needs to be determined (step 1). Then,  $n_{O2\_C}$ , times the molar mass of oxygen,  $M_{O2}$ ,  
 81 equals the COD of one mol equivalent of the specific CA,  $m_{COD\_Ci}$  (step 2). Relating  $m_{COD\_Ci}$  to  
 82 the molar mass of the CA,  $M_{Ci}$ , equals the conversion factor,  $f_{COD\_Ci}$ , between one mass  
 83 equivalent of the CA to one mass equivalent of COD (step 3). The yield of the individual CA  
 84 with  $i$  C-atoms,  $C_i$ , produced (in g) per fed substrate in the case studies A and B was  
 85 calculated in respect to the volumetric or gravimetric unit of the substrate (step 4). Similarly,  
 86 the CA yield can be expressed in COD equivalents per COD equivalent of the substrates  
 87 (step 5).

88

89 **Step 1:** Complete oxidation of *n*-caproic acid, *n*-caprylic acid and *n*-butyric acid.

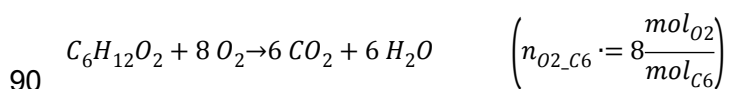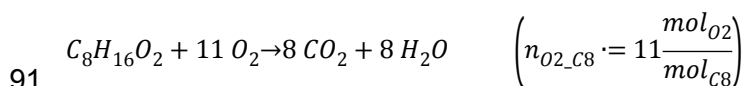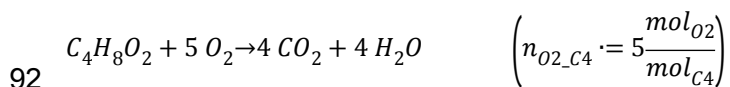

94 **Step 2:** Chemical oxygen demand (COD) for oxidation of one mol *n*-caproic acid (*n*-caprylic  
 95 acid and *n*-butyric acid).

$$96 \quad n_{O_2, Ci} \cdot M_{O_2} = m_{COD, Ci}$$

$$97 \quad 8 \frac{\text{mol}_{O_2}}{\text{mol}_{C_6}} \cdot 32 \frac{\text{g}_{O_2}}{\text{mol}_{O_2}} = 256 \frac{\text{g}_{COD}}{\text{mol}_{C_6}}$$

$$98 \quad \left( 11 \frac{\text{mol}_{O_2}}{\text{mol}_{C_8}} \cdot 32 \frac{\text{g}_{O_2}}{\text{mol}_{O_2}} = 352 \frac{\text{g}_{COD}}{\text{mol}_{C_8}} \quad \text{and} \quad 5 \frac{\text{mol}_{O_2}}{\text{mol}_{C_4}} \cdot 32 \frac{\text{g}_{O_2}}{\text{mol}_{O_2}} = 160 \frac{\text{g}_{COD}}{\text{mol}_{C_4}} \right)$$

99

100 **Step 3:** Mass equivalent COD to *n*-caproic acid (*n*-caprylic acid and *n*-butyric acid)

$$101 \quad \text{conversion factor using the respective molar masses, e.g.,} \quad M_{C_6} = 116.16 \frac{\text{g}_{C_6}}{\text{mol}_{C_6}}$$

$$102 \quad f_{COD, C_6} = \frac{256 \frac{\text{g}_{COD}}{\text{mol}_{C_6}}}{116.16 \frac{\text{g}_{C_6}}{\text{mol}_{C_6}}} \approx 2.204 \frac{\text{g}_{COD}}{\text{g}_{C_6}}$$

$$103 \quad \left( f_{COD, C_8} = \frac{352 \frac{\text{g}_{COD}}{\text{mol}_{C_8}}}{144.21 \frac{\text{g}_{C_8}}{\text{mol}_{C_8}}} \approx 2.441 \frac{\text{g}_{COD}}{\text{g}_{C_8}} \quad \text{and} \quad f_{COD, C_4} = \frac{160 \frac{\text{g}_{COD}}{\text{mol}_{C_4}}}{88.11 \frac{\text{g}_{C_4}}{\text{mol}_{C_4}}} \approx 1.816 \frac{\text{g}_{COD}}{\text{g}_{C_4}} \right)$$

104

105 **Step 4 – case study A:** CA yield per volumetric substrate unit (L) in case study A is  
 106 calculated as follows: Every 48 h, 666 mL of the 5 L bioreactor volume,  $V_{ASBR}$ , were  
 107 exchanged with diluted fresh substrate. From the total feed of 666 mL, 166 mL were corn  
 108 beer so that 166 mL fresh corn beer was fed every 48 h per 5 L. This equals a feed of  
 109  $feed_{\text{corn beer}} = 0.0166 \text{ L}_{\text{corn beer}} \text{ L}^{-1} \text{ d}^{-1}$ . The absolute yield of CA per corn beer can calculated as  
 110 follows:

$$111 \quad \text{absolute } CA_i \text{ yield per substrate} = \frac{r_{Ci, d, A}}{feed_{\text{corn beer}}}$$

112



113 **Step 4 – case study B:** CA yield per fed gravimetric substrate unit of dry substrate in case  
 114 study B

$$115 \text{ absolute } CA_i \text{ yield per substrate} = \frac{\text{end concentration of } CA \left[ \frac{g}{L} \right] \cdot V_{\text{leach-bed reactor}}}{\text{total fresh mass of corn silage per batch}}$$

116

117 **Step 5 – case study A:** The absolute CA yield per substrate is converted into a yield of COD  
 118 equivalents per COD of corn beer in case study A (COD content of corn beer, see Table S5):

$$119 \text{ COD equivalent } CA_i \text{ yield} = \frac{\text{absolute } CA_i \text{ yield per substrate} \cdot f_{\text{COD}_i}}{0.460 \frac{g_{\text{COD}}}{L_{\text{substrate}}}}$$

120

121 **Step 5 – case study B:** The absolute CA yield per substrate is converted into a yield of COD  
 122 equivalents per COD of corn silage in case study B (COD content of corn silage, see Table  
 123 S6):

$$124 \text{ COD equivalent } CA_i \text{ yield} = \frac{\text{absolute } CA_i \text{ yield per substrate} \cdot f_{\text{COD}_i}}{0.337 \frac{g_{\text{COD}}}{g_{\text{substrate}}}}$$

125

126 **S 1.2.3 Step 2 – Pertraction: Minimum extraction time to recover 1 mol L<sup>-1</sup>**  
 127 **carboxylic acid in back-extraction solution**

128 One critical parameter is the duration of microbial CA production in relation to the duration of  
 129 the CA electrolysis, *i.e.* the extraction time that is required to achieve a certain target  
 130 concentration of CA prior to electrolysis. Here we have assumed 1 mol L<sup>-1</sup> as threshold. For  
 131 an optimized extraction system, it is assumed that 95% extraction efficiency is achieved for  
 132 MCCA<sup>1</sup>. Further, the volume ratio of bioreactor liquid to back-extraction solution equals 10:1  
 133 in the assumed optimized extraction system.

134 We now adopt the assumptions for an optimized extraction in the case study A, yielding  
 135 mainly easily extractable MCCA. For *n*-caproic acid, 1.743 g COD L<sup>-1</sup> d<sup>-1</sup> was produced in the  
 136 bioreactor. When multiplying this rate by 95% extraction efficiency and by the volume ratio  
 137 10 L L<sup>-1</sup> (bioreactor to extraction solution), 16.56 g COD L<sup>-1</sup> (extraction solution) d<sup>-1</sup> *n*-caproic

138 acid would daily accumulate in the back-extraction solution ( $6.5 \times 10^{-2} \text{ mol L}^{-1} \text{ d}^{-1}$ ).  
 139 Additionally,  $2.695 \text{ g COD L}^{-1}$  (bioreactor)  $\text{d}^{-1}$  *n*-caprylic acid times 95% extraction efficiency  
 140 times  $10 \text{ L L}^{-1}$  (bioreactor to extraction solution) equals  $25.6 \text{ g COD L}^{-1}$  *n*-caprylic acid  
 141 accumulation rate in the back-extraction solution ( $7.3 \times 10^{-2} \text{ mol L}^{-1} \text{ d}^{-1}$ ). When now relating  
 142 the sum of the daily accumulating MCCA to the target concentration of CA in the back-  
 143 extraction solution ( $1 \text{ mol L}^{-1}$ ), the minimum extraction time would be shortened to  $\approx 7.3 \text{ d}$   
 144 assuming optimized extraction, but identical fermentation performance as observed in case  
 145 study A.

146

### 147 S 1.3 Step 3 – Kolbe electrolysis: Electrolysis performance

148 For better comparability, all electrolysis were set to achieve  $\approx 0.6$  Farad equivalents (FE). In  
 149 this study, FE (eq. S6) are defined as the ratio between the charge that is transferred over  
 150 time,  $Q_t$  (eq. S7), and the charge that is theoretically required to convert all educt molecules  
 151 in solution (*i.e.* CA molecules),  $Q_{CA\_tot}$ .  $Q_{CA\_tot}$  is calculated according to Faraday's law (eq.  
 152 S8), with  $F$  being the Faraday constant,  $z$  being the charge transfer number (*i.e.* the number  
 153 of electrons transferred per oxidation or reduction of the target compound, here:  $z = 1$  since  
 154 hydrocarbon products of the electrolysis are preferred, cf. Figure S1) and  $n_{CA\_tot}$  being the  
 155 amount of CA molecules in the reaction volume (*i.e.*, CA concentration in  $\text{mol L}^{-1}$  times  
 156 reaction volume in L). The Coulombic efficiency ( $CE$ , eq. S9) is assumed to equal 100% for  
 157 determining the charge to be transferred during each electrolysis to achieve  $\approx 0.6$  FE  
 158 ( $Q_t = 2800 \text{ C}$ ).

$$FE(t) = \frac{Q_t}{Q_{CA\_tot}} = \frac{\int_0^t idt}{n_{CA\_tot} \cdot F \cdot z} \quad (\text{eq. S6})$$

$$Q_t(t_{elec}) = \int_0^{t_{elec}} idt \quad (\text{eq. S7})$$

$$Q_{CA@i} = n_{CA@i} \cdot F \cdot z \quad i = tot \quad OR \quad i = elec \quad (\text{eq. S8})$$

159 The  $CE$  was defined as the ratio between  $Q_t$  and the charge that is theoretically required to  
 160 convert the amount of CA molecules that were oxidized during the electrolysis,  $Q_{CA\_elec}$  and  
 161  $n_{CA\_elec}$ , based on the difference in CA concentration before and after electrolysis as  
 162 accessed via HPLC analysis assuming  $z = 1$  (eq. S9).

163 Throughout the electrolysis experiments, the working electrode potential,  $E_{WE}$ , was set to  
 164 +3 V vs. Ag/AgCl (sat. KCl) and the counter electrode potential,  $E_{CE}$ , was varying. The  
 165 difference between  $E_{WE}$  and  $E_{CE}$  is the cell potential,  $E_{cell}$ . The power input for the  
 166 electrochemical half cell reaction at the working electrode,  $P_{WE}$ , is defined as the product of  
 167 current,  $i$ , and  $E_{WE}$  (eq. S10) and was accessed as described earlier<sup>2</sup>. The maximum current  
 168 density,  $j_{max}$ , was calculated by dividing the maximum current read out of the current-time  
 169 curve by geometrical surface area of the working electrode,  $A_{electrode}$ .

$$CE = \frac{Q_{CA\_elec}}{Q_t} \quad (\text{eq. S9})$$

$$P_{WE} = i \cdot E_{WE} \quad (\text{eq. S10})$$

170 The electric energy for the half cell reaction to convert 1 mol of CA,  $W_{WE}$ , was calculated  
 171 using eq. S11, by relating the electric energy consumed during the electrolysis to convert the  
 172 amount of CA that was actually converted (accessed by HPLC sampling, see below),  $n_{CA\_elec}$ .

$$W_{WE} = \frac{P_{WE} \cdot t_{elec}}{n_{CA\_elec}} \quad (\text{eq. S11})$$

173 The rate of electrochemical CA conversion,  $r_{CA}$ , was calculated according to eq. S12, by  
 174 relating  $n_{CA\_elec}$  to  $t_{elec}$  and the geometrical electrode surface area,  $A_{electrode}$ , of the working  
 175 electrode.

$$r_{CA} = \frac{n_{CA\_elec}}{t_{elec} \cdot A_{electrode}} \quad (\text{eq. S12})$$

176 Finally, the carbon balance of the electrolysis step was evaluated. For this, the total amount  
 177 of C-atoms bound in the electrolysis products was related to the amount of C-atoms in the  
 178 CA that were electrochemically converted. The total amount of C-atoms recovered in the  
 179 identified electrolysis products was accessed by multiplying the molar concentration of each  
 180 compound by its number of C-atoms and the electrolysis volume (50 mL) and summing up  
 181 over all identified products (except CO<sub>2</sub>), e.g. 1 mol *n*-tetradecane contains 14 mol C-atoms,  
 182 assuming a *n*-tetradecane concentration of  $1 \times 10^{-2}$  mol L<sup>-1</sup> *n*-tetradecane in 0.05 L, this  
 183 equals  $7 \times 10^{-3}$  mol of the C-atoms recovered in the electrolysis product. The consumed C-  
 184 atoms during CA oxidation were similarly assessed. First, the molar CA consumption was  
 185 derived from HPLC or GC-MS data (section 3.2). For each individual CA with  $i$  C-atoms, the  
 186 delta in molar CA concentration was multiplied by the electrolysis volume. Due to the

187 decarboxylation step (Figure S1), the delta in CA molecules was multiplied by  $i-1$  to yield the  
188 amount of C-atoms recoverable in the electrolysis product per CA, which was then summed  
189 up over all CA. This approach for the carbon balance is valid for each potential electrolysis  
190 product except for esters, where one of the two CA still contains the CO<sub>2</sub>. However, esters  
191 were only found in minor quantities.

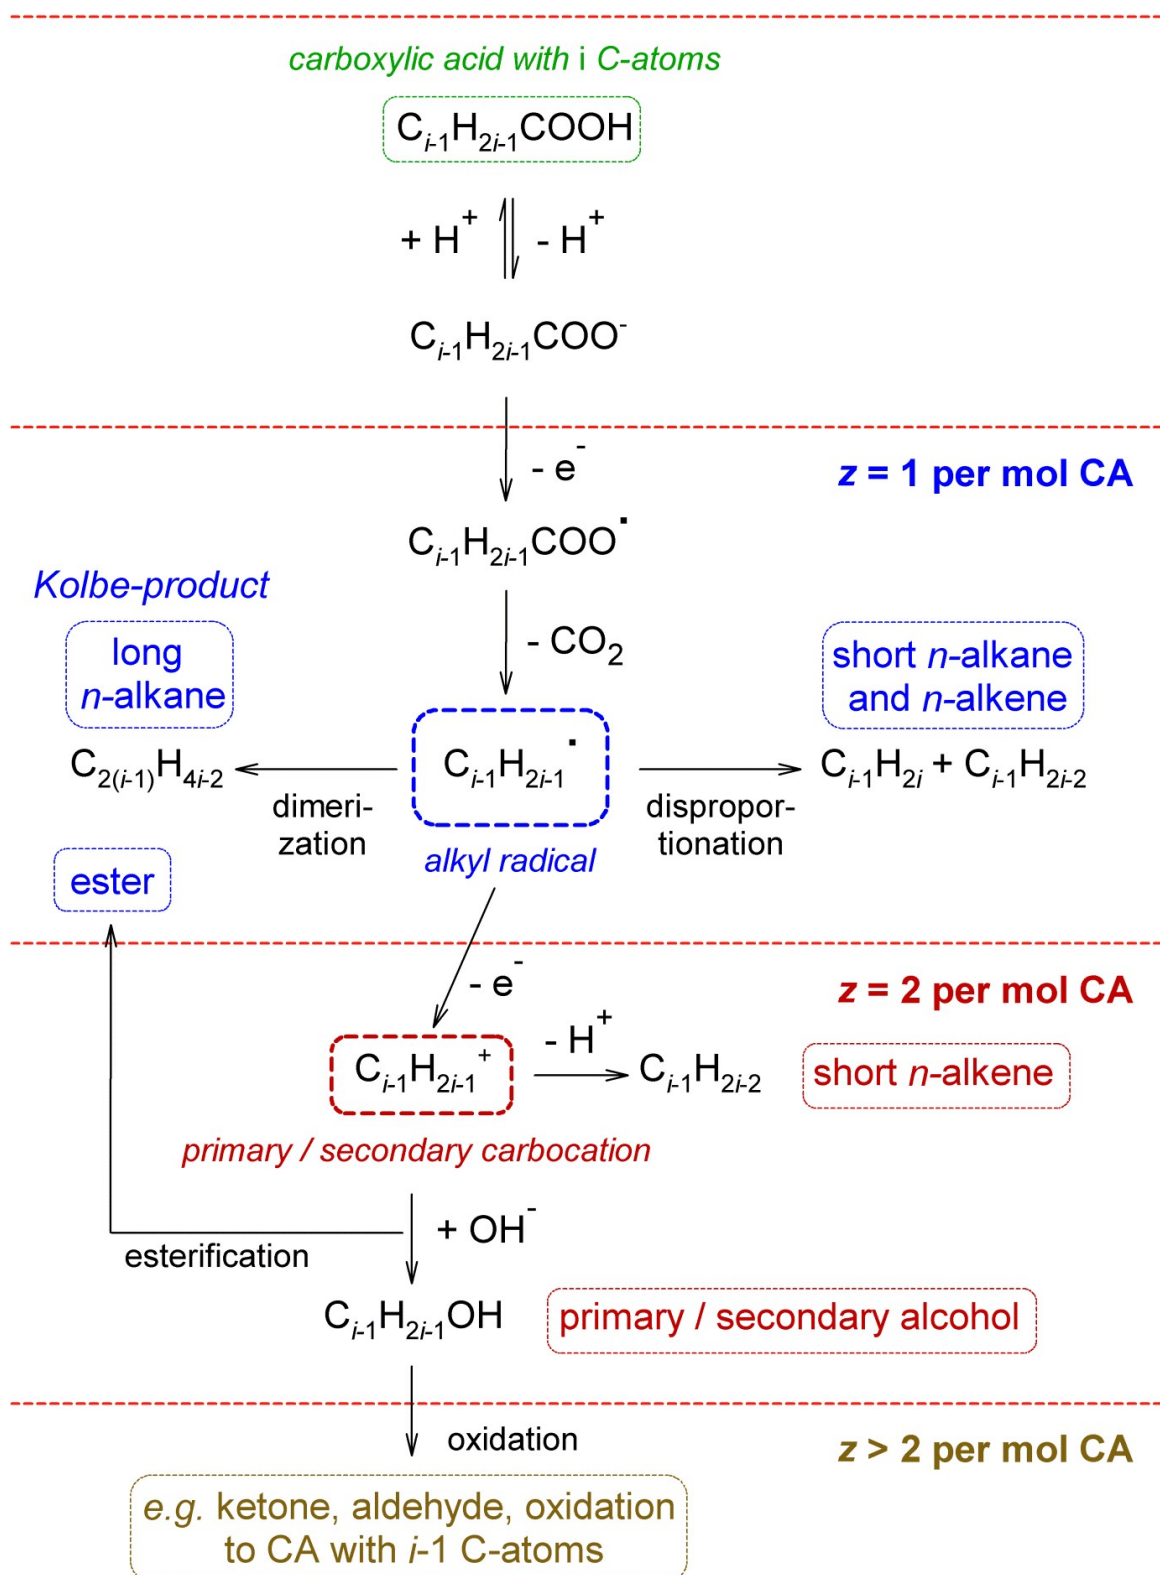

193

194 **Figure S 1:** Reaction pathways for CA electrolysis adapted from<sup>3</sup>: The carboxylate ion with *i* C-atoms  
 195 can be oxidized at positive potentials (>2.5 V vs. standard hydrogen electrode) to yield a reactive alkyl  
 196 radical (*z* = 1). The alkyl radical undergoes follow-up reactions yielding different electrolysis products,  
 197 for example the Kolbe-product is derived from the dimerization of two alkyl radicals. In case the alkyl  
 198 radical is oxidized to a carbocation, the derived products are considered *z* = 2 products.

## 200 S 2 Results

### 201 S 2.1 Details on the performance of the microbial and electrochemical 202 conversions

#### 203 S 2.1.1 Step 1 (*Bioreactor*) and step 3 (*Kolbe electrolysis*) - Production rates and 204 yields of carboxylic acids and hydrocarbons

205 **Table S 2: Summary of Step 1 – *Bioreactor*:** The representative (case study A) or maximum (case  
206 study B) CA production rates during anaerobic fermentation. Calculations are presented in eq. S4-S5;  
207 step 1-4.

| Parameter                                            | Case study A<br>(corn beer)                  | Case study B<br>(corn silage)                |
|------------------------------------------------------|----------------------------------------------|----------------------------------------------|
| COD content of substrate                             | 460 g COD L <sup>-1</sup>                    | 337 g COD kg <sup>-1</sup>                   |
| volumetric loading rate of<br>bioreactor             | 7.64 g COD L <sup>-1</sup> d <sup>-1</sup>   | 117.4 g COD L <sup>-1</sup><br>(13 d batch)  |
| fraction of fed COD that was<br>degraded             | 63.4%                                        | 45.6%                                        |
| <b>volumetric production rate of CA</b>              | <b>[g L<sup>-1</sup> h<sup>-1</sup>]</b>     | <b>[g L<sup>-1</sup> h<sup>-1</sup>]</b>     |
| propionic acid                                       | *                                            | 0.009                                        |
| <i>n</i> -butyric acid                               | 0.008                                        | 0.166                                        |
| <i>n</i> -valeric acid                               | *                                            | 0.001                                        |
| <i>n</i> -caproic acid                               | 0.033                                        | 0.013                                        |
| <i>n</i> -enanthic acid                              | 0.001                                        | 0.000                                        |
| <i>n</i> -caprylic acid                              | 0.046                                        | 0.001                                        |
| <i>iso</i> -CA                                       | 0.001                                        | 0.005                                        |
| <b>volumetric production rate of CA</b>              | <b>[g COD L<sup>-1</sup> d<sup>-1</sup>]</b> | <b>[g COD L<sup>-1</sup> d<sup>-1</sup>]</b> |
| propionic acid                                       | 0.008                                        | 0.141                                        |
| <i>n</i> -butyric acid                               | 0.330                                        | 2.187                                        |
| <i>n</i> -valeric acid                               | 0.010                                        | 0.016                                        |
| <i>n</i> -caproic acid                               | 1.743                                        | 0.144                                        |
| <i>n</i> -enanthic acid                              | 0.056                                        | 0.001                                        |
| <i>n</i> -caprylic acid                              | 2.695                                        | 0.005                                        |
| <i>iso</i> -CA                                       | 0.030                                        | 0.065                                        |
| sum C <sub>4</sub> , C <sub>6</sub> , C <sub>8</sub> | 4.778                                        | n.a.**                                       |
| sum <i>n</i> - and <i>iso</i> -MCCA                  | 4.496                                        | n.a.**                                       |
| sum total CA ≥3 C-atoms                              | 4.872                                        | n.a.**                                       |

208 \* traces, below limit of detection. \*\* summing up volumetric production rates of CA is not applicable for  
209 case study B, as CA are produced consecutively during batch mode (Figure S2).

210 **Table S 3: Summary of Step 1 – Bioreactor and Step 3 – Kolbe electrolysis:** Representative (case  
 211 study A) and maximum achieved (case study B) yields for anaerobic CA production and electrolysis of  
 212 CA enriched back-extraction solution in case studies A and B, respectively.

| Parameter                                                                                 | Case study A<br>(corn beer, composition<br>in Table S5) | Case study B<br>(corn silage, composition<br>in Table S6) |
|-------------------------------------------------------------------------------------------|---------------------------------------------------------|-----------------------------------------------------------|
| <b>Yield of product per substrate<br/>(COD) added to the <i>bioreactor</i></b>            | <b>[g COD g<sup>-1</sup> COD]</b>                       | <b>[g COD g<sup>-1</sup> COD]</b>                         |
|                                                                                           | <b>Step 1 - Bioreactor</b>                              |                                                           |
| propionic acid                                                                            | 0.001                                                   | 0.018                                                     |
| <i>n</i> -butyric acid                                                                    | 0.043                                                   | 0.207                                                     |
| <i>n</i> -valeric acid                                                                    | 0.001                                                   | 0.004                                                     |
| <i>n</i> -caproic acid                                                                    | 0.228                                                   | 0.030                                                     |
| <i>n</i> -enanthic acid                                                                   | 0.007                                                   | 0.000                                                     |
| <i>n</i> -caprylic acid                                                                   | 0.353                                                   | 0.001                                                     |
| <i>iso</i> -CA                                                                            | 0.004                                                   | 0.016                                                     |
| sum C <sub>4</sub> , C <sub>6</sub> , C <sub>8</sub>                                      | 0.626                                                   | 0.238                                                     |
| sum <i>n</i> - and <i>iso</i> -MCCA                                                       | 0.589                                                   | 0.038                                                     |
| sum total CA ≥3 C-atoms                                                                   | 0.638                                                   | 0.276                                                     |
|                                                                                           | <b>Step 3 - Kolbe electrolysis</b>                      |                                                           |
| hydrocarbon                                                                               | 0.480                                                   | 0.085                                                     |
| total organic product                                                                     | 0.499                                                   | 0.126                                                     |
| <b>Yield of product per substrate<br/>(fresh mass) added to the<br/><i>bioreactor</i></b> | <b>[g L<sup>-1</sup>]</b>                               | <b>[g kg<sup>-1</sup>]</b>                                |
|                                                                                           | <b>Step 1 - Bioreactor</b>                              |                                                           |
| propionic acid                                                                            | 0.3                                                     | 4.0                                                       |
| <i>n</i> -butyric acid                                                                    | 11.0                                                    | 38.4                                                      |
| <i>n</i> -valeric acid                                                                    | 0.3                                                     | 0.7                                                       |
| <i>n</i> -caproic acid                                                                    | 47.7                                                    | 4.5                                                       |
| <i>n</i> -enanthic acid                                                                   | 1.4                                                     | 0.03                                                      |
| <i>n</i> -caprylic acid                                                                   | 66.5                                                    | 0.2                                                       |
| <i>iso</i> -CA                                                                            | 0.9                                                     | 2.8                                                       |
| sum C <sub>4</sub> , C <sub>6</sub> , C <sub>8</sub>                                      | 125.1                                                   | 43.1                                                      |
| sum <i>n</i> - and <i>iso</i> -MCCA                                                       | 115.7                                                   | 5.9                                                       |
| sum total CA ≥3 C-atoms                                                                   | 128.1                                                   | 50.7                                                      |
|                                                                                           | <b>Step 3 - Kolbe electrolysis</b>                      |                                                           |
| hydrocarbon                                                                               | 63.7                                                    | 8.3                                                       |
| total organic product                                                                     | 67.2                                                    | 15.6                                                      |

214 **S 2.1.2**            **Step 1 – Bioreactor: Carboxylic acid fermentation off-gas**

215 Apart from CA, also biogas is produced during the CA fermentation in case study A and case  
216 study B, containing energy rich CH<sub>4</sub> and H<sub>2</sub> that can both be used energetically on-site. In  
217 case study A, the fermentation off-gas consisted of mainly CH<sub>4</sub> (54 ± 14%) and nitrogen (N<sub>2</sub>,  
218 41 ± 12%), but also contained minor amounts of CO<sub>2</sub> (1.2 ± 0.8%) and H<sub>2</sub> (0.4 ± 0.2%). On  
219 average, a highly fluctuating daily biogas production of 0.034 ± 0.026 L L<sup>-1</sup> d<sup>-1</sup> [gas/  
220 bioreactor volume] was recorded in case study A. For example, about 0.018 L L<sup>-1</sup> d<sup>-1</sup> CH<sub>4</sub>  
221 were produced daily, which is equivalent to 0.002 L g<sup>-1</sup> COD [CH<sub>4</sub> / substrate COD].

222 The composition of the fermentation gas in case study B was highly fluctuating due to the  
223 different sequential processes occurring during batch processing, containing CH<sub>4</sub>  
224 (2.9 ± 3.5%), N<sub>2</sub> (36.7 ± 15.8%), CO<sub>2</sub> (48.3 ± 20.0%) and H<sub>2</sub> (3.9 ± 6.5%). No quantitative  
225 data for the gas volume flow is available for case study B.

226



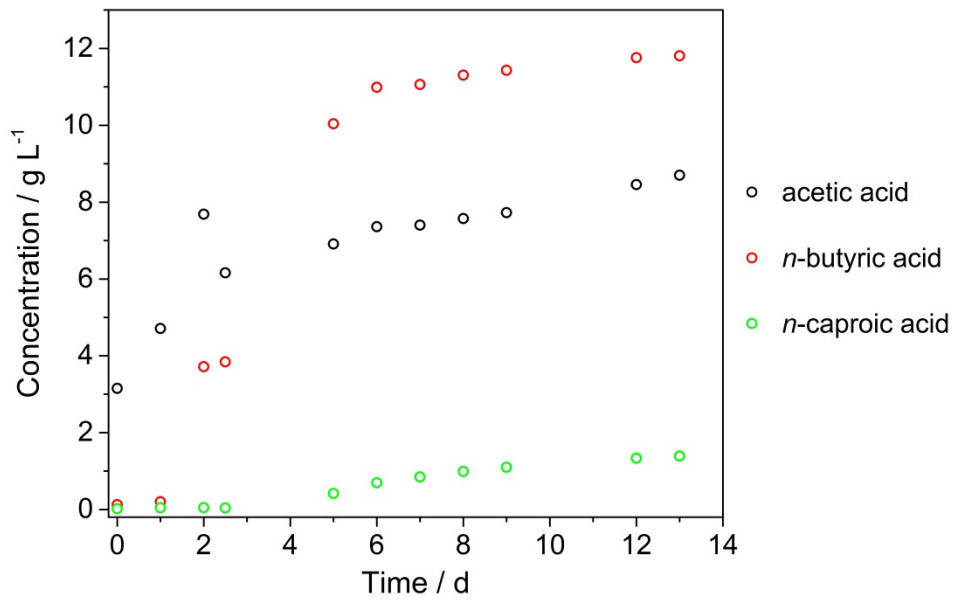

229

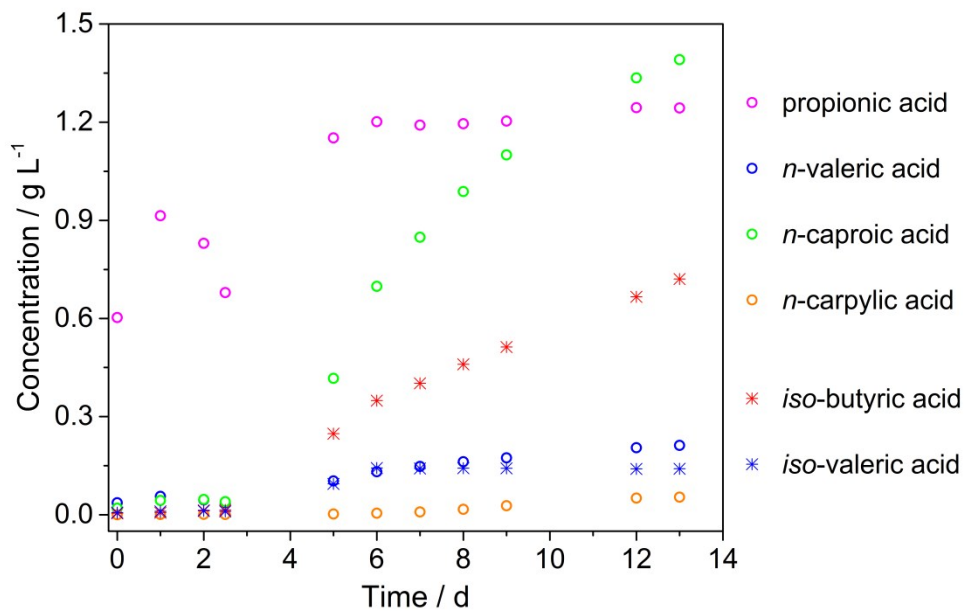

230

231 **Figure S 2:** Carboxylic acid production from corn silage in case study B over time, with initially  
 232 preferred acetic and *n*-butyric acid accumulation followed by *n*-caproic acid accumulation.

233 **S 2.3**            **Step 3 – Kolbe electrolysis: Liquid, non-aqueous carboxylic acid**  
234                            **electrolysis product composition**

235 Figure S3 shows the phase separation of the non-aqueous and the aqueous phase after  
236 electrolyzing 100 mL of the exemplary CA mixture for accessing the fuel characteristics of  
237 the non-aqueous electrolysis product.

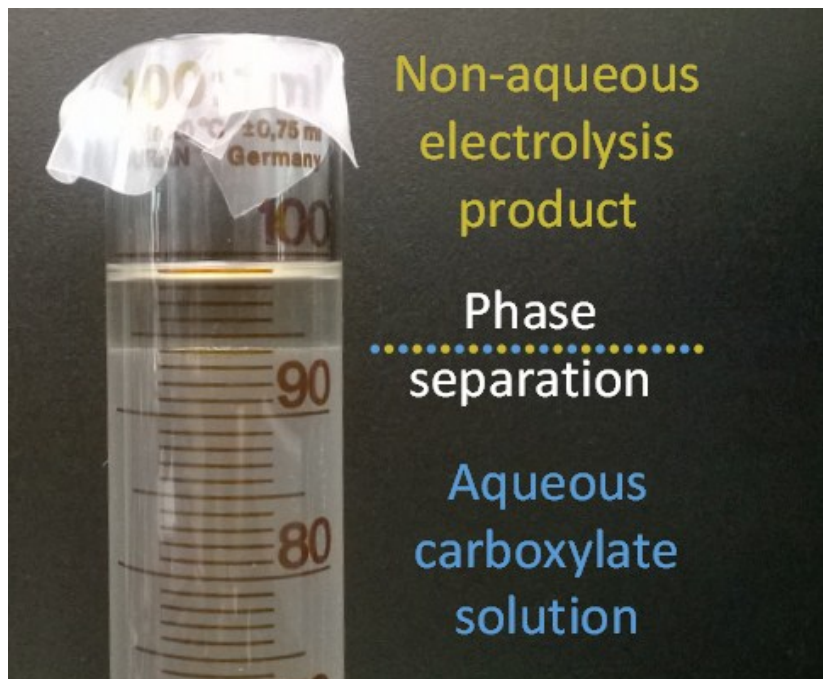

238

239 **Figure S 3:** Photograph of phase separation of the aqueous phase and the non-aqueous liquid  
240 product phase after electrolysis.

241

242 The exemplary solution mirroring the CA composition of the back-extraction solution of case  
243 study A had a higher pH (12.0) and thus, a slightly higher conductivity (34.8 mS cm<sup>-1</sup>).  
244 However, this did not result in major differences in electrolysis performance and the liquid  
245 electrolysis product composition, *i.e.* the product spectrum derived from the exemplary CA  
246 mixture was almost identical to the observations in case study A (Figure S4). In short, *n*-  
247 alkanes in the range of *n*-heptane to *n*-tetradecane (and traces of *n*-pentadecane) were the  
248 main components (85.5%) followed by *n*-alkenes, covering 9.6% based on the mol fraction.  
249 Further components were esters (2.3%), alcohols (0.5%), octanoic acid (0.3%) and others.  
250 This similarity in composition justifies that the parameters for the evaluation of the  
251 applicability of the electrolysis product as drop-in biofuel were derived from electrolysis  
252 experiments using the exemplary CA mixture.

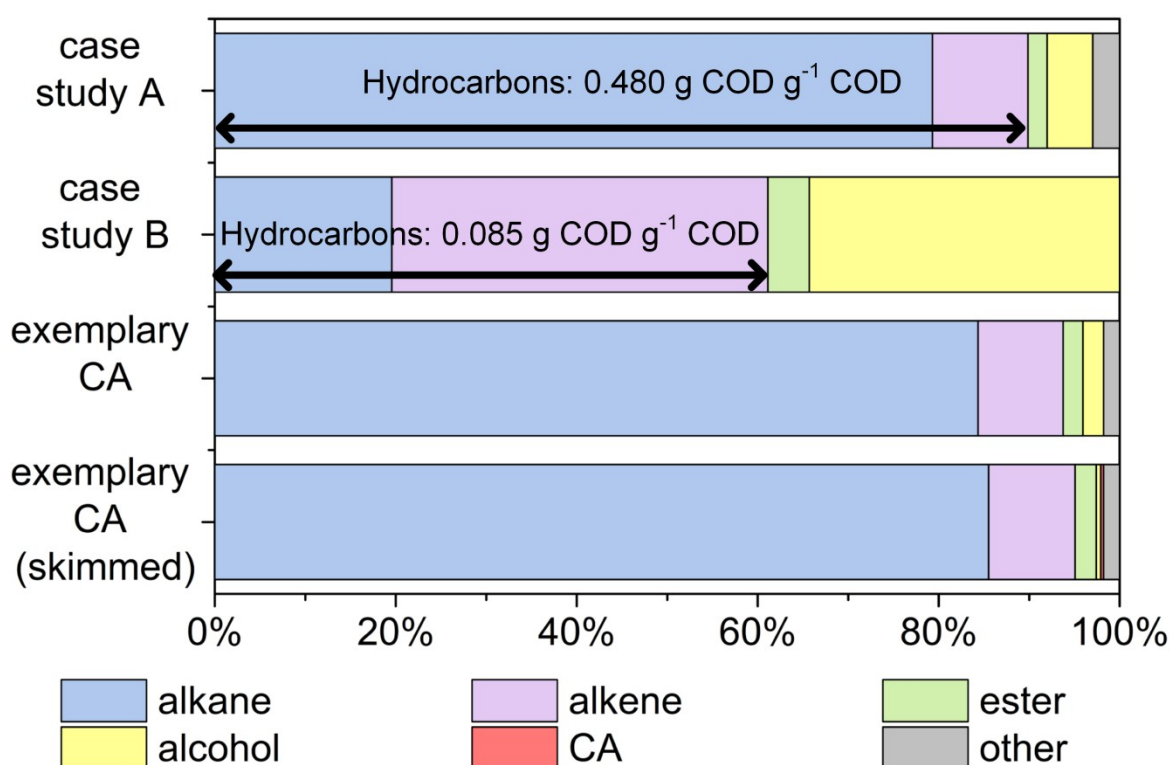

253

254 **Figure S 4:** Composition of the liquid electrolysis product of the exemplary CA mixture in comparison  
 255 to case study A and case study B. From top to bottom: case study A or B electrolysis product  
 256 composition after extracting the total aqueous volume in *n*-pentane, pure non-aqueous phase  
 257 skimmed off the exemplary CA sample (without *n*-pentane extraction step); exemplary CA electrolysis  
 258 product composition after extracting the total aqueous volume in *n*-pentane. The illustrated  
 259 hydrocarbon yield relates to the COD of the substrate fed to the bioreactor (corn beer or corn silage for  
 260 case studies A or B, respectively).

261

262 The most prominent difference in composition of the electrolysis products concerns the  
 263 amount of alcohols, which was lower for the collected non-aqueous electrolysis product  
 264 phase for the exemplary CA solution compared to the electrolysis results in case study A  
 265 (0.7% vs. 5.2% alcohol content, Figure S4). This observation could partly be explained by the  
 266 different analysis protocols (cf. section S. 3.2.2 experimental section). As alcohols are slightly  
 267 more soluble in water than the *n*-alkanes, especially when considering that the majority of the  
 268 *n*-alkanes possess a longer carbon chain ( $C_7$  to  $C_{14}$ ) than the detected alcohols ( $C_5$  to  $C_7$ ), it  
 269 is possible that the alcohols were partly dissolved in the aqueous phase and thus, not  
 270 detected in the separated non-aqueous phase in such high quantities. However, the  
 271 combined analysis of the aqueous and non-aqueous phase for the electrolysis with the  
 272 exemplary CA solution also showed smaller fractions of alcohols compared to case study A

273 (2.3% vs. 5.2%, Figure S4), indicating that less alcohols were formed in the exemplary CA  
274 mixture.

275 Note that also minor quantities of *n*-caprylic acid (0.4%) were detected in the harvested non-  
276 aqueous phase (Figure S4). Even though the majority of CA was present in the dissociated  
277 form during electrolysis, there was still a minor fraction of protonated CA that could have  
278 partitioned in the non-aqueous phase. This partitioning during the electrolysis was not  
279 detected for the electrolysis product analysis in case studies A and B, since the aqueous and  
280 non-aqueous phase were evaluated simultaneously and it was assumed that all CA detected  
281 were derived from the aqueous phase. The partitioning of the CA in the non-aqueous phase  
282 is not only a sink of CA, it also diminishes CA electrolysis product quality. Thus, highly  
283 alkaline pH values should be applied to minimize the risk of CA getting extracted by the non-  
284 aqueous electrolysis product phase.

285

#### 286 **S 2.4 Step 3 – Kolbe electrolysis: Oxygen, hydrogen and carbon content of** 287 **non-aqueous, liquid electrolysis product**

288 The oxygen, hydrogen and carbon contents by weight of the CA electrolysis product given in  
289 Table 5 (see article) were derived from GC-MS data. Though the oxygen content of the  
290 electrolysis product (0.7%, *i.e.* <1%) was below the maximum for gasoline<sup>4</sup>, the electrolysis  
291 step has to be designed carefully to minimize the fraction of alcohols, acids and esters in the  
292 non-aqueous electrolysis product. Besides preferring MCCA over short-chain CA, the bulk  
293 pH should be fairly alkaline to avoid partitioning of the strongly hydrophobic CA in the non-  
294 aqueous electrolysis product phase. Whereas the carbon content of the electrolysis product  
295 was slightly below the suggested range for diesel (84.1 wt% vs. 86.2 wt%), the hydrogen  
296 content was higher than allowed by the legal recommendations in Germany (15.1 wt% vs.  
297 13.5 wt%)<sup>5</sup>. For one, this discrepancy is observed due to the different chain lengths of *n*-  
298 alkanes, being in the range of 10 to 25 C-atoms for diesel, but in the range of 7 to 15  
299 C-atoms for the electrolysis product from MCCA with 6 to 8 C-atoms<sup>5</sup>. Yet, the major reason  
300 for exceeding the hydrogen content is that diesel (and gasoline, respectively) contain  
301 aromatic compounds with higher carbon-to-hydrogen ratios (*e.g.* benzene C<sub>6</sub>H<sub>6</sub> vs. hexane,  
302 C<sub>6</sub>H<sub>14</sub>), whereas the electrolysis product is free of aromatic compounds (Table 5).  
303 Consequently, the electrolysis product also exceeds the recommendations regarding the *n*-  
304 alkane and *n*-alkene content by far (Table 5). Whereas high amounts of *n*-alkanes are  
305 desirable for diesel to improve ignition properties, gasoline requires the opposite to retain a  
306 high resistance towards self-ignition (knock resistance)<sup>6</sup>.

307

## 308 **S 2.5 Estimation of temperature dependent density**

309 The density,  $\rho$ , of the non-aqueous electrolysis product ( $0.75 \pm 0.01 \text{ g mL}^{-1}$  at  $22^\circ\text{C}$ ) was  
310 determined at room temperature ( $22^\circ\text{C}$ , details see section S 3.3). In order to compare  $\rho$  of  
311 the electrolysis product to the recommendations for gasoline and fuel at  $15^\circ\text{C}$ , it was  
312 therefore necessary to convert the measured  $\rho$  to lower temperatures. The  $\rho$  conversion  
313 performed in this study was based on assumptions that are detailed in the following.

314 In eq. S13, the temperature dependent  $\rho$  of various organic compounds is described with  $T$  in  
315 K and  $\rho$  in  $\text{kmol m}^{-3}$ . The respective compound-specific constants  $B_1$ ,  $B_2$ ,  $B_3$  and  $B_4$  can be  
316 reviewed in charts<sup>7</sup>.

$$\rho(T) = \left(\frac{B_1}{B_2}\right) \left[1 + \left(1 - \frac{T}{B_3}\right)^{B_4}\right] \quad (\text{eq. S13})$$

317 Since *n*-alkanes with 7 to 14 C-atoms and 1-heptene were found to be the main component  
318 of the liquid electrolysis product (Figure S4), we calculated the density increase for each of  
319 these compounds for the temperature difference between  $25^\circ\text{C}$  and  $15^\circ\text{C}$ . However, using  
320 the molar mass of each compound and the respective converting factor for the volume,  $\rho$  can  
321 be expressed in  $\text{g cm}^{-3}$ .

322 Table S4 lists the factors  $B_1$  to  $B_4$  and the derived  $\rho$  for each compound at  $15^\circ\text{C}$  and at  $25^\circ\text{C}$ .  
323 The average increase of  $\rho$  for a temperature decrease from  $25^\circ\text{C}$  to  $15^\circ\text{C}$  for all the  
324 mentioned main electrolysis products components was observed to be 1%. Consequently,  
325 the  $\rho$  of the electrolysis product was converted by increasing the measured  $\rho$  value at  $22^\circ\text{C}$   
326 by 1% to be valid at  $15^\circ\text{C}$ , *i.e.*  $0.76 \pm 0.01 \text{ g mL}^{-1}$ .

327 **Table S 4:** Constants for temperature dependent density of main components of the liquid electrolysis product<sup>7</sup>.

| Component             | Molar mass<br>[g mol <sup>-1</sup> ] | B <sub>1</sub> <sup>7</sup> | B <sub>2</sub> <sup>7</sup> | B <sub>3</sub> <sup>7</sup> | B <sub>4</sub> <sup>7</sup> | $\rho$ (15°C)<br>[g cm <sup>-3</sup> ] | $\rho$ (25°C)<br>[g cm <sup>-3</sup> ] | $\rho$ (25°C) /<br>$\rho$ (15°C) |
|-----------------------|--------------------------------------|-----------------------------|-----------------------------|-----------------------------|-----------------------------|----------------------------------------|----------------------------------------|----------------------------------|
| <i>n</i> -heptane     | 100.20                               | 0.612590                    | 0.26211                     | 540.20                      | 0.28141                     | 0.690                                  | 0.682                                  | 101.2%                           |
| <i>n</i> -octane      | 114.20                               | 0.537310                    | 0.26115                     | 568.70                      | 0.28034                     | 0.707                                  | 0.699                                  | 101.1%                           |
| <i>n</i> -nonane      | 128.30                               | 0.483870                    | 0.26147                     | 594.60                      | 0.28281                     | 0.722                                  | 0.715                                  | 101.0%                           |
| <i>n</i> -decane      | 142.30                               | 0.428310                    | 0.25745                     | 617.70                      | 0.28912                     | 0.734                                  | 0.727                                  | 101.0%                           |
| <i>n</i> -undecane    | 156.30                               | 0.390000                    | 0.25678                     | 639.00                      | 0.29130                     | 0.744                                  | 0.736                                  | 101.0%                           |
| <i>n</i> -dodecane    | 170.30                               | 0.355441                    | 0.25511                     | 658.00                      | 0.29368                     | 0.752                                  | 0.745                                  | 100.9%                           |
| <i>n</i> -tridecane   | 184.39                               | 0.321600                    | 0.25040                     | 675.00                      | 0.30710                     | 0.761                                  | 0.754                                  | 100.9%                           |
| <i>n</i> -tetradecane | 198.39                               | 0.305450                    | 0.25350                     | 693.00                      | 0.30538                     | 0.766                                  | 0.759                                  | 100.9%                           |
| 1-heptene             | 98.19                                | 0.637340                    | 0.26319                     | 537.29                      | 0.27375                     | 0.701                                  | 0.693                                  | 101.2%                           |
| <b>average</b>        |                                      |                             |                             |                             |                             |                                        |                                        | <b>101.0%</b>                    |

328

## 329 S 2.6 Brief comparison to established biofuels

330 As discussed in the main article, the product is considered as a renewable suitable fuel-  
331 additive, similarly to HVO and FAME. First of all, the gained product possesses a similar  
332 composition (Figure S4) as HVO, which contains mainly *n*-alkanes and *iso*-alkanes<sup>5,6</sup>. The  
333 main differences in the composition are the lack of *iso*-alkanes and the occurrence of minor  
334 quantities of oxygen containing carbon compounds (Figure S4) in the product. But since the  
335 oxygen content of the electrolysis product was <1% (Table 5), it is speculated that its addition  
336 yields a positive effect on the diesel fuel performance similar to adding HVO. For instance,  
337 adding HVO to diesel increases the cetane number (min. 51)<sup>8</sup>, and thus improves ignition  
338 properties<sup>5,6</sup>. Further, CO emissions are reduced and the amount of unburned hydrocarbons  
339 (soot formation) is decreased when HVO is added to diesel<sup>5,6</sup>. Yet, HVO is produced from  
340 biological triglycerides by applying high temperatures and hydrogen pressures, which is  
341 potentially more energy intense than the microbial and electrochemical conversion<sup>5,6</sup>. Thus,  
342 compared to HVO production, the electrolysis product might be accessible with lower energy  
343 expenditure, as neither high temperatures nor elaborated hydrogen pressures are required.  
344 In addition to HVO, fatty acid methyl esters (FAME) are also extensively used as diesel  
345 additives, and therefore FAME are potentially competing with the diesel fuel additive  
346 produced in this study. However, due to the excellent stability and the low polarity of the  
347 *n*-alkanes being the main products of the electrolysis, we speculate that the electrolysis  
348 product has superior properties compared to FAME<sup>9</sup>. Additionally, the proposed process  
349 applies carbohydrate-rich substrates (*e.g.* crops) in contrast to HVO and FAME, whose  
350 production is based on fats (*e.g.* waste oil or plant oil). Moreover, in line with the biorefinery  
351 concept, whole plants can be exploited in the proposed process, by exploiting fermentation  
352 residues for biogas production, which we consider as an additional advantage over  
353 conventional bio-based fuel additives.

## 354 S 2.7 Overall performance and engineering of the process-line

355 Generally, the CA derived from pre-fermented (corn-based) model substrates were  
356 successfully and reproducibly converted to a variety of organic products which could be  
357 applied as a drop-in fuel respectively fuel additive in the discussion of the main article. For  
358 case study A, liquid hydrocarbons dominated the product spectrum, whereas shorter, more  
359 volatile hydrocarbons and alcohols were the main CA electrolysis products in case study B  
360 (Figure 2). Note that the reported yields for the final products reported in Table 2 are slightly  
361 underestimated due to the incomplete recovery of converted CA in identified products as  
362 discussed. However, on a technical scale (*i.e.* in a stainless steel plant), the recovery of  
363 products can be expected to be much easier than on a lab scale. The hydrocarbon yield  
364 obtained in case study A (0.480 g COD g<sup>-1</sup> COD, Table 2) is highly remarkable, considering  
365 the conditions: anaerobic fermentation, complex substrates, and applying a reactor  
366 microbiome.

367 When comparing case studies A (using liquid feedstock) and B (using solid feedstock), we  
368 show that the optimum product spectrum is achieved when hydrophobic MCCA rather than  
369 short-chain CA are the main products of the fermentation (step 1, Figure 2 and Table 3).  
370 Thus, a crucial step is the adaptation of the reactor microbiome to produce the desired CA  
371 mixture, preferably MCCA. As the knowledge on MCCA fermentation rapidly increases<sup>10</sup> and  
372 it was recently shown that *n*-caprylic acid can be produced with 91-96% efficiency<sup>1</sup>, we are  
373 confident that a selective CA fermentation can be achieved in future. Even *iso*-carboxylic  
374 acids, which could also be part of the CA spectrum<sup>11,12</sup> (as also observed in case study B,  
375 Table S3), can be decarboxylated electrochemically<sup>13</sup>, and therefore valorized. However, an  
376 efficient and fast MCCA extraction system (*e.g.* pertraction) proved to be essential to  
377 stimulate anaerobic MCCA production. Fortunately, the MCCA extraction system as  
378 successfully established (*e.g.* by Agler *et al.*<sup>14</sup>, Ge *et al.*<sup>15</sup>, or Kucek *et al.*<sup>16</sup>) offers cheap  
379 operating costs and allows the recycling of the extraction solvent and phase transfer catalyst  
380 during a long period of time (four years of continuous CA extraction without performance loss  
381 of the recycled solvent). In addition, any NaOH that is added to maintain an alkaline pH in the  
382 back-extraction solution can also be recycled when the back-extraction solution is exchanged  
383 between extraction and electrolysis. Nevertheless, future studies are required to investigate  
384 the life-time of the membrane modules operated with complex substrates (*i.e.* diminish  
385 membrane fouling) and access the optimum volume scale proportions between bioreactor  
386 and back-extraction solution to enable a fast CA build-up *prior* to electrolysis. Here also other  
387 technologies like using decanters sieve belt presses, screw presses or filtration units may be  
388 considered.



389 The electrolysis of MCCA yielded excellent results in terms of *CE*, power input, and operating  
390 time (Table 4). Due to the phase separation of the aqueous reaction phase and the non-  
391 aqueous electrolysis product, only simple downstream processing is required to gain the final  
392 product (Figures 2 and S3). In addition to the liquid product, the gaseous and volatile  
393 products are easily captured. It is well known that introducing H<sub>2</sub> and CO<sub>2</sub> as main  
394 electrolysis exhaust gases to the anaerobic fermentation allows the fermentative production  
395 of ethanol, which in turn promotes CA chain elongation<sup>10</sup>. Therefore, future studies which  
396 recycle the electrolysis exhaust gases to the bioreactor might even further improve the  
397 overall process performance. This positive effect on the fermentation step is also expected  
398 when reintroducing the evaporated alcohols from the electrolysis to the fermentation broth<sup>17</sup>.

399 Regarding the electrolysis step, the main challenge is the electrode engineering, as cheaper  
400 and more abundant materials than platinum as well as a 3D electrode architecture are  
401 needed to improve space-time yields. Alternative materials include non-noble metal alloys,  
402 glassy carbon, iridium and rhodium and alloys of rather low platinum loadings or boron-  
403 doped diamond electrodes<sup>18–21</sup>. Especially for large anodes, sputtering or vapor deposition  
404 on a backbone material may drastically reduce the amount of expensive metal catalyst  
405 required<sup>22</sup>. Applying sustainable and cost-competitive cathode materials for hydrogen  
406 evolution is also considered economically beneficial (e.g. molybdenum sulfides or transition  
407 metals are promising candidates<sup>23–25</sup>). Fortunately, the alkaline pH of the back-extraction  
408 solution did not negatively affect the Kolbe electrolysis of sufficiently hydrophobic MCCA.

409 Overall, there are several critical aspects which may challenge the feasibility of the proposed  
410 future technology. For example, here we applied corn-based, that is food-competitive, model  
411 substrates to demonstrate the suitability of the proposed process concept. However, the  
412 proposed process allows recovering resources (MCCA and finally, hydrocarbons and other  
413 organic carbon compounds) from different biomass and waste streams<sup>26</sup>. For example,  
414 ethanol-rich substrates (e.g. residues from the bioethanol industry) showed the highest  
415 production rates of *n*-caproic acid by reactor microbiomes, so far<sup>15,27</sup>. Further, municipal solid  
416 wastes<sup>28</sup>, lactate-rich substrates<sup>29–31</sup>, wine lees<sup>16</sup>, and wheat straw<sup>32</sup> are suited for CA  
417 production. Thus, treating waste streams from bioethanol industries or a combined  
418 processing of solid biomass and liquid waste streams seem to be the perfect setting. In  
419 addition to the biomass type, its local availability needs to be considered on a case-to-case  
420 basis.

421

422

423 **S 3 Experimental**

424 **S 3.1 Step 1 – Bioreactor: Microbial carboxylic acid fermentation**

425 Table S5 summarizes the characteristics of the liquid substrate that was fed to the anaerobic  
 426 bioreactor for CA production in case study A and Table S6.

427 **Table S 5:** Corn kernel-to-ethanol fermentation beer (short: corn beer) composition per volume. The  
 428 corn beer fed to the bioreactor in case study A was obtained from Western New York Energy in  
 429 Medina, NY, USA. The presented data and standard deviation (SD) are based on n = 6  
 430 measurements.

| Corn beer | pH   | Ethanol [g L <sup>-1</sup> ] | Total solids [g TS L <sup>-1</sup> ] | Volatile solids [g VS L <sup>-1</sup> ] | Inert solids [g IS L <sup>-1</sup> ] | Total COD [g COD L <sup>-1</sup> ] | Soluble COD [g COD L <sup>-1</sup> ] |
|-----------|------|------------------------------|--------------------------------------|-----------------------------------------|--------------------------------------|------------------------------------|--------------------------------------|
| average   | 4.6  | 122.2                        | 121.8                                | 109.7                                   | 12.2                                 | 461.3<br>(460 for calculations)    | 350.4                                |
| SD        | 0.01 | 1.8                          | 1.5                                  | 1.0                                     | 2.3                                  | 18.2                               | 11.7                                 |

431

432

433 **Table S 6:** Composition of corn silage substrate applied in case study B. The corn silage fed to the  
 434 batch bioreactor in case study B was obtained from a biogas plant in Neichen (Germany). The  
 435 presented data and standard deviation (SD) are based on n = 2 (TS) or n = 3 (VS, IS) measurements.

| Corn silage | pH     | Total solids [g TS kg <sup>-1</sup> ] | Volatile solids [g VS kg <sup>-1</sup> ] | Inert solids [g IS kg <sup>-1</sup> ] | Total COD [g COD kg <sup>-1</sup> ] |
|-------------|--------|---------------------------------------|------------------------------------------|---------------------------------------|-------------------------------------|
| average     | 3 to 4 | 348                                   | 337                                      | 11                                    | 337 (assumed according to 17,33)    |
| SD          | n.a.   | n.a.                                  | 0.3                                      | 0.3                                   | n.a.                                |

436

## 438 S 3.2 Chemical Analysis

439 This study is an interdisciplinary work in which the experiments were carried out in three  
440 different labs. Thus, chemical analyses for the determination of concentrations were  
441 performed using different hardware. The following paragraph specifies the methodological  
442 details for each setup (*i.e.*, case study A or B, CA production and/or CA extraction, liquid and  
443 gaseous electrolysis product composition), also including protocols for the respective sample  
444 preparation (if required).

445

### 446 S 3.2.1 Analysis of carboxylic acids in aqueous solution

447 In case study A, the concentrations of CA in the bioreactor and the back-extraction solution  
448 were analyzed using gas chromatography as described previously<sup>14</sup>.

449 In case study B, the concentrations of CA (acetic, propionic, *n*-butyric, *iso*-butyric, *n*-valeric,  
450 *iso*-valeric, *n*-caproic and *n*-caprylic acid) in liquid samples were determined in triplicate after  
451 derivatization using a 7890 A gas chromatograph (Agilent Technologies, Germany) equipped  
452 with a TurboMatrix 110 automatic headspace sampler (Perkin Elmer), an DB-FFAP column  
453 (0.5  $\mu\text{m}$   $\times$  250  $\mu\text{m}$   $\times$  60 m, Agilent Technologies) and a flame ionization detector. Nitrogen  
454 was the carrier gas with a flow rate of 3.62 mL min<sup>-1</sup>. The chromatographic conditions were  
455 as follows: injector temperature, 220°C (split-splitless); detector temperature, 250°C; and an  
456 oven temperature program initiating at 40°C hold for 20 min followed by a temperature  
457 increase at a rate of 10 K min<sup>-1</sup> up to 200°C. The supernatant of a centrifuged sample was  
458 diluted 1:5 (v:v) with deionized water and 3 mL were filled into a 20-mL glass vial. To each  
459 vial, 1 mL internal standard (2-methylbutyric acid), 0.5 mL methanol and 2.5 mL 1:5 (v:v)  
460 diluted sulfuric acid were added.

461 For off-line extraction of CA in case study B, the CA concentration in the process liquid and  
462 in the back-extraction solution was monitored using HPLC (Shimadzu Scientific Instruments).  
463 Compound identification and quantification was based on external standards (three point  
464 calibration,  $R^2 = 0.99$ ). The analysis was performed with a refractive index detector (RID-  
465 10A) on a Hi-Plex H column (300  $\times$  7.7 mm ID, 8  $\mu\text{m}$  pore size, Agilent Technologies). The  
466 sample was injected at 50°C oven temperature and was eluted with  $5 \times 10^{-3}$  mol L<sup>-1</sup> H<sub>2</sub>SO<sub>4</sub> at  
467 0.5 mL min<sup>-1</sup>.

468 The concentration of CA prior and subsequent to electrolysis experiments (case study A, B  
469 and exemplary CA mixture) was monitored using the same HPLC system as described for  
470 the off-line extraction of CA in case study B, but was carried out at 65°C and was eluted with

471  $5 \times 10^{-3} \text{ mol L}^{-1} \text{ H}_2\text{SO}_4$  at a flow rate of  $0.6 \text{ mL min}^{-1}$ . The HPLC data for CA in aqueous  
472 solution was used to calculate the CA consumption throughout the electrolysis. The aqueous  
473 sample for HPLC analysis was gathered by dipping a pipet tip in the aqueous/non-aqueous  
474 mixture after electrolysis (no removal of non-aqueous phase prior to HPLC sampling).

475

### 476 **S 3.2.2 Analysis of liquid electrolysis product**

477 The liquid electrolysis product of case study A or case study B was characterized using GC-  
478 MS analysis after the electrolysis was finished and a sample ( $200 \mu\text{L}$ ) for HPLC analysis of  
479 the aqueous phase was gathered for quantifying CA consumption (details on HPLC analysis  
480 see above). The pH of the two-phase reaction volume (large amount of aqueous, small  
481 amount of non-aqueous phase, Figure S3) was adjusted to drop below pH 2 by adding  
482  $6 \text{ mol L}^{-1} \text{ HCl}$ . Due to acidification, most of the CA in the sample were protonated.  
483 Subsequently, *n*-pentane was used to extract the hydrophobic electrolysis products and the  
484 protonated CA to the non-aqueous phase (volume share *n*-pentane to electrolysis liquid  
485 equals 3 to 5, *i.e.*  $30 \text{ mL } n\text{-pentane}$  to  $50 \text{ mL}$  total electrolysis volume). Note that due to the  
486 extraction step in *n*-pentane, any *n*-pentane produced during electrolysis could not be  
487 detected. Other solvents for extraction *prior* to GC-MS analysis of the non-aqueous  
488 electrolysis products were also tested (*n*-hexane, dichloromethane, chloroform, methyl  
489 *tert*-butyl ether, ethyl acetate, diethyl ether, *iso*-octane and toluene), but *n*-pentane was  
490 suited best for liquid electrolysis product analysis *via* GC-MS despite the potential error of  
491 *n*-pentane loss.

492 The *n*-pentane phase enriched with electrolysis products was further diluted in *n*-pentane  
493 and analyzed via GC-MS (GC 7890A and MSD 5975 InertXL, Agilent), using a DB-FFAB  
494 capillary column ( $30 \text{ m}$ ,  $0.25 \text{ mm}$ ,  $0.25 \mu\text{m}$ , Agilent) with helium as carrier gas (nominal  
495  $1.2 \text{ mL min}^{-1}$  constant flow, adjusted for retention time locking) and undecanoic acid methyl  
496 ester as internal control standard. The initial temperature was  $50^\circ\text{C}$  (hold for 2 min) and was  
497 increased to  $250^\circ\text{C}$  at a rate of  $15 \text{ K min}^{-1}$ .

498 CA, *n*-alkanes, alcohols and most of the expected esters were identified using retention  
499 times and mass spectra of pure compounds. Other products were identified by a mass  
500 spectrum database (NIST14 database). The concentrations of CA, *n*-alkanes and alcohols  
501 were determined using external standards and generation of a real-time calibration database  
502 (three calibration levels). The concentrations of esters and other products were estimated  
503 using an average response factor of all target compounds in the mentioned database.

504 Subsequent to the end of each electrolysis in case study B, the cooling trap was washed with  
505 1 mL *n*-pentane. An aliquot was then injected to the GC-MS using the same settings as  
506 described above to determine the condensate composition. A second washing step with  
507 1 mL fresh *n*-pentane was performed and the *n*-pentane of the second step was also  
508 analyzed. The concentration of the condensate found in step 1 and 2 of the washed cooling  
509 trap were summed up.

510 In some cases, the non-aqueous electrolysis product was harvested and separated from the  
511 aqueous phase after the electrolysis has finished (exemplary CA mixture used to collect  
512 larger amounts of non-aqueous product used for the comparison to fuel parameters). In this  
513 case, the extraction step was skipped and the non-aqueous sample was directly diluted in *n*-  
514 pentane. Besides that, the analytical workflow was identical to the workflow described above.

515 The water phase, depleted of electrolysis products due to *n*-pentane extraction, was diluted  
516 in acidic water ( $10 \times 10^{-3} \text{ mol L}^{-1} \text{ HCl}$ ) and analyzed via GC-MS using a ZB-WAXplus  
517 capillary column (30 m, 0.25 mm, 0.25  $\mu\text{m}$ , Supelco) and propionic acid as internal control  
518 standard for samples derived from case study A (no internal control standard for case study  
519 B). Other GC-MS parameters and the identification/quantitation routine were the same as  
520 described for the non-aqueous phase.

521

### 522 **S 3.2.3 Analysis of gaseous electrolysis product**

523 In case study B, the exhaust gas of the electrolysis was collected in a gastight bag made of  
524 aluminum composite material (barrier material: Hermann Nawrot AG, Wipperfuert, H  
525 Germany). After the electrolysis, the total amount of exhaust gas was measured via water  
526 volume displacement,  $V_{\text{gas\_measured}}$ . The  $V_{\text{gas\_measured}}$  was converted to the normal volume,  $V_0$ ,  
527 with eq. S14 by considering the temperature,  $T$ , and pressure,  $p_L$ , of the environment  
528 (meteorological station (TFA 20.2027.20, TFA-Dostmann, Wertheim-Reicholzheim,  
529 Germany) in the lab) and assuming the vapor pressure of water for 100% water saturated air,  
530  $p_w$ , in dependency of  $T$  and relate the value to the normal temperature,  $T_0$  (273 K), and the  
531 normal pressure,  $p_0$  (101.325 Pa). The composition of the exhaust gas was measured using  
532 a four channel (*i.e.* column) 3000 Micro GC Gas Analyzer (INFICON, Cologne, Germany)  
533 with a thermal conductivity detector (GC-TCD). For details on the configuration of the four  
534 columns, see Table S7. External standard calibration (at least two levels) enabled the  
535 determination of the molar fraction of hydrogen, oxygen, nitrogen, carbon dioxide, methane,  
536 ethane, ethene, propane, propene, *n*-pentane and *n*-hexane. Further, *n*-butane and 1-butene  
537 were detected as a joint peak.

$$V_0 = V_{gas\_measured} \cdot \frac{(p_L - p_W) \cdot T_0}{p_0 \cdot T} \quad (\text{eq. S14})$$

538 Subsequent to GC-TCD measurement, the absolute amount of each component in mol was  
 539 calculated as described in DIN-14912, assuming that the gas mixture behaved like an ideal  
 540 gas mixture of real gases. First, the average molar mass of the gas mixture was accessed by  
 541 multiplying the molar fraction of each component by its particular molar mass and this was  
 542 summed up over all identified components. Similarly, the mean volumetric density of the gas  
 543 mixture was determined by multiplying the normal density of each component by its molar  
 544 fraction and summing the factors up. For components that are not gaseous at normal  
 545 conditions, the density at their boiling point, *i.e.* the lowest temperature at which the  
 546 component is gaseous, was used instead of the density at normal state. Subsequently, the  
 547 mass of the total gas mixture was calculated by multiplying  $V_0$  with the average density of the  
 548 gas mixture. In a next step, the mass of the gas mixture was divided by its mean molar mass,  
 549 yielding the absolute amount of all gas particles in mol. Finally, the total amount of gas in mol  
 550 was multiplied by the molar fraction of each gas to yield the absolute amount of each gas in  
 551 mol.

552

553 **Table S 7:** Specification for exhaust gas composition analysis, *i.e.* gaseous electrolysis products, in  
 554 case study B. All columns and injectors were provided by INFICON (Cologne, Germany).

| Column/<br>Parameter        | Unit               | 14 m Molsieve<br>with 2 m Plot U<br>pre-column, 1<br>$\mu\text{l}$ backflush<br>injector | 8 m Plot Q,<br>variable<br>volume<br>injector | 8 m OV-1,<br>1.2 $\mu\text{m}$ thick,<br>variable<br>volume<br>injector | 10 m<br>Stabilwax,<br>variable<br>volume<br>injector |
|-----------------------------|--------------------|------------------------------------------------------------------------------------------|-----------------------------------------------|-------------------------------------------------------------------------|------------------------------------------------------|
| carrier gas                 |                    | argon                                                                                    | helium                                        | helium                                                                  | helium                                               |
| sample inlet<br>temperature | $^{\circ}\text{C}$ | 100                                                                                      | 100                                           | 100                                                                     | 100                                                  |
| injector<br>temperature     | $^{\circ}\text{C}$ | 100                                                                                      | 100                                           | 100                                                                     | 100                                                  |
| column<br>temperature       | $^{\circ}\text{C}$ | 100                                                                                      | 80                                            | 60                                                                      | 60                                                   |
| injection time              | ms                 | 0                                                                                        | 25                                            | 250                                                                     | 250                                                  |
| running time                | min                | 5                                                                                        | 5                                             | 5                                                                       | 5                                                    |
| column<br>pressure          | psi                | 25                                                                                       | 20                                            | 20                                                                      | 15                                                   |

555

#### 556 **S 3.2.4 Analysis of the gas composition in the anaerobic fermentation**

557 In case study A, the concentrations of methane, CO<sub>2</sub>, and hydrogen gases were analyzed by  
558 gas chromatography as described earlier<sup>16</sup>. In case study B, one milliliter gas from the  
559 anaerobic fermentation process was injected into a 20 mL vial filled with argon. The samples  
560 were analyzed by gas chromatography (Clarus 580 with Turbomatrix™ Headspace Sampler  
561 110, Perkin Elmer, Massachusetts, USA) using a thermal conductivity detector as well as two  
562 columns (7' HayeSep N 60/80, 1/8" Sf for analysis of CO<sub>2</sub> and 9' Molecular Sieve 13X 45/60  
563 1/8" Sf for analysis of CH<sub>4</sub>, H<sub>2</sub>, O<sub>2</sub>, and N<sub>2</sub>). Argon was used as carrier gas at 25 mL min<sup>-1</sup>.  
564 The temperatures of the injector, columns and detector were 150°C, 60°C and 200°C,  
565 respectively.

566

#### 567 **S 3.3 Characterizing fuel properties of the CA electrolysis product**

568 The fuel characteristics of the liquid electrolysis product were accessed applying an  
569 exemplary CA solution, mirroring the composition of the main MCCA observed in case study  
570 A (Table S8). In total, the non-aqueous phase of 14 separate electrolysis of the exemplary  
571 CA mixture was merged, each of them yielding ≈2.5 mL liquid non-aqueous electrolysis  
572 product per 50 mL exemplary CA mixture (Figure S3). On average, 44% conversion of  
573 0.97 mol L<sup>-1</sup> CA (initial concentration, Table 3) were achieved. An aliquot of the merged non-  
574 aqueous, liquid electrolysis product of the exemplary CA mixture was used for characterizing  
575 selected fuel parameters, which are detailed below.

576

577 **Table S 8:** Composition of exemplary CA mixture applied for assessing fuel characteristics.

| <b>CA - name</b>        | <b>CA - composition<br/>[g L<sup>-1</sup> / mol L<sup>-1</sup>]</b> |
|-------------------------|---------------------------------------------------------------------|
| <i>n</i> -caproic acid  | 39.0 / 0.33                                                         |
| <i>n</i> -enanthic acid | 5.2 / 0.04                                                          |
| <i>n</i> -caprylic acid | 86.2 / 0.60                                                         |
| <b>sum</b>              | <b>130.4 / 0.97</b>                                                 |

578

579 The composition of this accumulated electrolysis product was analyzed via GC-MS as  
580 described in S 3.2.2. The atom fractions of the electrolysis product (*i.e.* the carbon, hydrogen

581 and oxygen contents) were calculated based on the gravimetric concentration of each  
582 electrolysis product, the structural formula ( $C_iH_jO_k$ ) and the particular molar mass.

583 The density of the liquid, non-aqueous electrolysis product was determined at room  
584 temperature (22°C) using a 5 mL pycnometer type Gay-Lussac (borosilicate glass 3.3, DIN  
585 ISO 3507, BRAND, Wertheim, Germany). The tare weight and the weight of the pycnometer  
586 filled with the aliquot of the sample were measured in three replicates.

587 The kinematic viscosity at 40°C was measured with a Stabinger viscometer (ASTM D445,  
588 SVM3000, Anton Paar GmbH, Graz, Austria, ASTM D445).

589 The water content was determined via coulometric Karl-Fischer-titration (DIN EN 14346,  
590 AQUA 40.00, ECH Elektrochemie Halle GmbH).

591 To characterize the energy content of the electrolysis product per mass, we determined the  
592 higher heating value (other names: gross calorific value or gross energy) at a constant  
593 volume by burning the electrolysis product in oxygen using a calorimetric bomb under the  
594 conditions specified in the standard operation procedure (DIN EN 14918, Parr 6400  
595 Calorimeter, Parr Instrument (Deutschland) GmbH).

596 The analysis of sodium was performed by the ASG Analytik-Service Gesellschaft mbH  
597 (Neusäss, Germany) using a modified method according to the DIN-standard procedure for  
598 elemental analysis, especially determination of sodium, potassium, calcium, lead, nickel,  
599 phosphorous, copper and zinc contents in diesel fuel via inductively coupled plasma optical  
600 emission spectrometry (ICP-OES)<sup>34</sup>.

601



## 603 S 4 References

- 604 1 L. A. Kucek, C. M. Spirito and L. T. Angenent, *Energy Environ. Sci.*, 2016, **9**, 3482–  
605 3494.
- 606 2 C. Stang and F. Harnisch, *ChemSusChem*, 2016, **9**, 50–60.
- 607 3 P. F. Levy, J. E. Sanderson, R. G. Kispert and D. L. Wise, *Enzyme Microb. Technol.*,  
608 1981, **3**, 207–215.
- 609 4 DIN EN 228:2014-10, *DIN EN 228:2014-10 Kraftstoffe für Kraftfahrzeuge - unverbleite*  
610 *Ottokraftstoffe - Anforderungen und Prüfverfahren*, DIN-Normenausschuss  
611 Materialprüfung (NMP) Fachausschuss Mineralöl- und Brennstoffnormung (FAM), Berlin,  
612 2012.
- 613 5 *Dieselmotoren - Anforderungen, Qualität, Perspektiven*, Aral Aktiengesellschaft,  
614 Forschung und Technik, Bochum, 2010.
- 615 6 M. (Ed.) Lackner, F. Winter and A. K. Agarwal, *Handbook of combustion*, Wiley-VCH,  
616 Weinheim, 2010.
- 617 7 R. H. Perry, D. W. Green and J. O. Maloney, Eds., in *Perry's chemical Engineers'*  
618 *handbook*, The McGraw-Hill Companies, 7th edn., 1999, pp. 142–146.
- 619 8 *DIN EN 590:2014-04 Kraftstoffe für Kraftfahrzeuge - Dieselmotoren - Anforderungen*  
620 *und Prüfverfahren*, DIN-Normenausschuss Materialprüfung (NMP) Fachausschuss  
621 Mineralöl- und Brennstoffnormung (FAM), Berlin, 2014.
- 622 9 D. Yue, F. You and S. W. Snyder, *Comput. Chem. Eng.*, 2014, **66**, 36–56.
- 623 10 L. T. Angenent, H. Richter, W. Buckel, C. M. Spirito, K. J. Steinbusch, C. Plugge, D. P.  
624 B. T. B. Strik, T. I. M. Grootscholten, C. J. N. Buisman and H. V. M. Hamelers, *Environ.*  
625 *Sci. Technol.*, 2016, **50**, 2796–2810.
- 626 11 F. Morgan-Sagastume, S. Pratt, a Karlsson, D. Cirne, P. Lant and a Werker, *Bioresour.*  
627 *Technol.*, 2011, **102**, 3089–97.
- 628 12 P. J. Weimer, M. Nerdahl and D. J. Brandl, *Bioresour. Technol.*, 2015, **175**, 97–101.
- 629 13 A. J. Bard, M. Stratmann and H. J. Schäfer, *Encyclopedia of Electrochemistry: Volume 8:*  
630 *Organic electrochemistry*, Wiley-VCH Verlag, Weinheim, 2004.
- 631 14 M. T. Agler, C. M. Spirito, J. G. Usack, J. J. Werner and L. T. Angenent, *Energy Environ.*  
632 *Sci.*, 2012, **5**, 8189–8192.
- 633 15 S. Ge, J. G. Usack, C. M. Spirito and L. T. Angenent, *Environ. Sci. Technol.*, 2015, **49**,  
634 8012–8021.
- 635 16 L. A. Kucek, J. Xu, M. Nguyen and L. T. Angenent, *Front. Microbiol.*, 2016, **7**, 1–14.
- 636 17 T. I. M. Grootscholten, F. Kinsky dal Borgo, H. V. M. Hamelers and C. J. N. Buisman,  
637 *Biomass and Bioenergy*, 2013, **48**, 10–16.

- 638 18 Y. B. Vassiliev and V. A. Grinberg, *J. Electroanal. Chem.*, 1992, **336**, 281–307.
- 639 19 J. Barroso, a. R. Pierna, T. C. Blanco, E. Morallón and F. Huerta, *Int. J. Hydrogen*  
640 *Energy*, 2011, **36**, 12574–12582.
- 641 20 A. Kapałka, B. Lanova, H. Baltruschat, G. Fóti and C. Comninellis, *J. Electrochem. Soc.*,  
642 2008, **155**, E96.
- 643 21 J. D. Wadhawan, F. J. Del Campo, R. G. Compton, J. S. Foord, F. Marken, S. D. Bull, S.  
644 G. Davies, D. J. Walton and S. Ryley, *J. Electroanal. Chem.*, 2001, **507**, 135–143.
- 645 22 H. J. Schäfer, in *Topics in Current Chemistry, Vol. 152, Electrochemistry IV*, ed. E.  
646 Steckhan, Springer, Berlin, Heidelberg, 1990, pp. 91–151.
- 647 23 D. Merki and X. Hu, *Energy Environ. Sci.*, 2011, **4**, 3878.
- 648 24 D. Kong, J. J. Cha, H. Wang, H. R. Lee and Y. Cui, *Energy Environ. Sci.*, 2013, **6**, 3553.
- 649 25 B. Konkena, K. Junge Puring, I. Sinev, S. Piontek, O. Khavryuchenko, J. P. Dürholt, R.  
650 Schmid, H. Tüysüz, M. Muhler, W. Schuhmann and U.-P. Apfel, *Nat. Commun.*, 2016, **7**,  
651 12269.
- 652 26 C. M. Spirito, H. Richter, K. Rabaey, A. J. M. Stams and L. T. Angenent, *Curr. Opin.*  
653 *Biotechnol.*, 2014, **27**, 115–22.
- 654 27 D. Vasudevan, H. Richter and L. T. Angenent, *Bioresour. Technol.*, 2014, **151**, 378–82.
- 655 28 T. I. M. Grootsholten, D. P. B. T. B. Strik, K. J. J. Steinbusch, C. J. N. Buisman and H.  
656 V. M. Hamelers, *Appl. Energy*, 2014, **116**, 223–229.
- 657 29 H. Sträuber, M. Schröder and S. Kleinstüber, *Energy. Sustain. Soc.*, 2012, **2**, 13.
- 658 30 H. Sträuber, R. Lucas and S. Kleinstüber, *Appl. Microbiol. Biotechnol.*, 2016, **100**, 479–  
659 491.
- 660 31 L. A. Kucek, M. Nguyen and L. T. Angenent, *Water Res.*, 2016, **93**, 163–171.
- 661 32 H. Sträuber, F. Bühligen, S. Kleinstüber, M. Nikolausz and K. Porsch, *Bioengineering*,  
662 2015, **2**, 66–93.
- 663 33 E. ten Brummeler, PhD Thesis *Dry Anaerobic Digestion of the Organic Fraction of*  
664 *Municipal Solid Waste*, Wageningen University, 1993.
- 665 34 *DIN EN 16476:2014-07 Flüssige Mineralölerzeugnisse - Bestimmung des Gehalts an*  
666 *Natrium, Kalium, Calcium, Phosphor, Kupfer, Zink in Dieselmotoren - Direkte*  
667 *Bestimmung durch optische Emissionsspektrometrie mit induktiv gekoppeltem Plasma*  
668 *(ICP OES)*, DIN-Normenausschuss Materialprüfung (NMP) Fachausschuss Mineralöl-  
669 und Brennstoffnormung (FAM), Berlin, 2014.
